# Supplementary material for: Characterization of Iflavirus in the Red Flour Beetle, Tribolium castaneum (Coleoptera; Tenebrionidae)
Source: MDPI journal article supplement (doi:10.3390/insects14030220), 2023-02-23
Supplement: s1 [file s1]

Fatehi et al. 2023. Characterization of Iflavivirus in the Red Flour Beetle, *Tribolium Castaneum* (Tenebrionidae; Coleoptera).

Supplementary data S3. The oligonucleotides used for qPCR

| Primer     | Sequence                      |
|------------|-------------------------------|
| RdRp-RT-F  | CCCTTGAGAGTTTTAATGCTCATGTG    |
| RdRp-Probe | CTCAAGAACCACACTTCACGAATATCGGT |
| RdRp-RT-R  | CGCCGCATTCTGGATACTATC         |
| rpS3-F     | GACCGTGTTTTGGGGGAGAAGA        |
| rpS3-R     | CTTTAGCGCCACATTCCATGATGT      |
| rpS3-Probe | CTAAGAGACTCTGCTTGTGCAATGGCA   |
