# Supplementary material for: Characterization of Iflavirus in the Red Flour Beetle, Tribolium castaneum (Coleoptera; Tenebrionidae)
Source: MDPI journal article supplement (doi:10.3390/insects14030220), 2023-02-23
Supplement: s1 [file s1]

Fatehi et al. 2023. Characterization of Iflavirus in the Red Flour Beetle, *Tribolium Castaneum* (Tenebrionidae; Coleoptera).

Supplementary data S1. *Tribolium castaneum* strains used for TcIV prevalence study

| Species/Population        | Original collection       | Rearing Laboratory | TcIV |
|---------------------------|---------------------------|--------------------|------|
| * USDA                    | Unknown                   | Phillips           | -    |
| Columbia-1                | Columbia, MO              | Phillips           | -    |
| Japan-4                   | Ibaraki prefecture, Japan | Phillips           | -    |
| Brazil-4                  | Brazil                    | Phillips           | -    |
| Z-2                       | Chickasha, OK             | Phillips           | -    |
| Z-4                       | Cedar Rapids, IA          | Phillips           | -    |
| Abilene-1                 | Abilene, KS               | Phillips           | -    |
| NDG-2                     | Winnipeg, Canada          | Phillips           | -    |
| Costa Rica-1              | Costa Rica                | Phillips           | -    |
| Hudson, KS                | Hudson, KS                | Phillips           | -    |
| Brazil                    | Brazil                    | Phillips           | -    |
| Thailand                  | Thailand                  | Phillips           | -    |
| CO, Pyr-R                 | Unknown                   | Phillips           | -    |
| Brazil-5                  | Pacheco, Brazil           | Phillips           | -    |
| Shellenberger             | Manhattan, KS             | Phillips           | -    |
| A20 Rdiel                 | England                   | Phillips           | -    |
| GA2                       | Georgia                   | Phillips           | +    |
| Kansas-1                  | KS                        | Phillips           | +    |
| Belle Glade, FL           | Belle Glade, FL           | Phillips           | +    |
| Winnipeg, MB              | Winnipeg, Canada          | Phillips           | +    |
| Dark Shell`               | Manhattan, KS             | Phillips           | +    |
| Parlier, CA               | Parlier, CA               | Phillips           | +    |
| Rdiel-Bcy-Lab-S           | Unknown                   | Phillips           | +    |
| GA1                       | Georgia                   | Phillips           | +    |
| Red Level                 | Alabama                   | Phillips           | +    |
| Goliath                   | Derived from GA1          | Phillips           | +    |
| Arbuckle, CA              | Arbuckle, CA              | Phillips           | +    |
| Myrtle Grove, LA          | Los Angeles, CA           | Phillips           | +    |
| Nashville, GA             | Nashville, GA             | Phillips           | +    |
| Jonesboro, AR             | Jonesboro, AR             | Phillips           | +    |
| California                | CA                        | Phillips           | +    |
| Stuttgart, AR             | Stuttgart, AR             | Phillips           | +    |
| Lab-S-Rusty               | USDA                      | Phillips           | +    |
| Sokoloff-8                | Chicago                   | Phillips           | +    |
| QTC-279-Pyr-R             | Australia                 | Phillips           | +    |
| Ozark, AL                 | Ozark, AL                 | Phillips           | +    |
| GA1                       | Georgia                   | Zhu                | +    |
| GA1                       | Georgia                   | Brown              | +    |
| GA2                       | Georgia                   | Brown              | +    |
| Goliath                   | Derived from GA1          | Park               | +    |
| GA1                       | Georgia                   | Park               | +    |
| Vermillion                | Derived from GA1          | Park               | +    |
| Goliath×GA1               | Derived from GA1          | Park               | +    |
| <i>Tribolium freemani</i> | Manhattan, KS             | Park               | -    |
| <i>Tribolium confusum</i> | Belgium                   | Phillips           | -    |

Fatehi et al. 2023. Characterization of Iflavirus in the Red Flour Beetle, *Tribolium Castaneum* (Tenebrionidae; Coleoptera).

|                              |                         |        |   |
|------------------------------|-------------------------|--------|---|
| <i>Tribolium brevicornis</i> | USDA-ARS, Manhattan, KS | Scully | - |
| <i>Palorus ratzeburgii</i>   | USDA-ARS, Manhattan, KS | Scully | - |
| <i>Cynaesus angustus</i>     | USDA-ARS, Manhattan, KS | Scully | - |
| <i>Gnathocerus cornutus</i>  | USDA-ARS, Manhattan, KS | Scully | - |
| <i>Latheticus oryzae</i>     | USDA-ARS, Manhattan, KS | Scully | - |

\* USDA-ARS: Center for Grain and Animal Health Research, Manhattan, KS, USA
