# Supplementary material for: Characterization of Iflavirus in the Red Flour Beetle, Tribolium castaneum (Coleoptera; Tenebrionidae)
Source: MDPI journal article supplement (doi:10.3390/insects14030220), 2023-02-23
Supplement: s1 [file s1]

Fatehi et al. 2023. Characterization of Iflavirus in the Red Flour Beetle, *Tribolium Castaneum* (Tenebrionidae; Coleoptera).

#### Supplementary data S5. Free-of-TcIV Biosamples

| SRX accession #         | Geographic Location                                  | Strain                               |
|-------------------------|------------------------------------------------------|--------------------------------------|
| SRX8948418...SRX8948661 | University of Zurich (GEO)                           | Cro1                                 |
| SRX8710218...SRX8710245 | University of Cologne                                | San Bernardino                       |
| SRX8370579...SRX7895778 | University of Kentucky                               | Unknown                              |
| SRX6384970...SRX6385152 | University of Zurich (GEO)                           | Cro1                                 |
| SRX425536...SRX425562   | Leiden University (GEO)                              | San Bernardino                       |
| SRX5329740...SRX5329748 | USDA, Insect Control and Cotton Disease Research, TX | Unknown                              |
| SRX4809500...SRX4809503 | University of Kentucky                               | Unknown                              |
| SRX4782863-SRX4782864   | German Center for Cancer Research (GEO)              | GA-2                                 |
| SRX4666274...SRX4666290 | Texas A&M University (GEO)                           | GA-2                                 |
| SRX4509171...SRX4509176 | Anyang Institute of Technology                       | Unknown                              |
| SRX3238141...SRX3238156 | Miami University (GEO)                               | Unknown                              |
| SRX2745603...SRX2944938 | University of Kentucky                               | GA-2                                 |
| SRX2741222...SRX2741229 | University of Kentucky                               | QTC279 (pyrethroid resistant strain) |
| SRX2609558...SRX2609560 | University Hospital Erlangen                         | Unknown                              |
| SRX1647966...SRX1669666 | University of Cologne, Inst. for developmental Biol  | San Bernadino   cultivar:AG Roth     |
| SRX1396587...SRX1396874 | University of Greifswald                             | Unknown                              |
| SRX878244...SRX878666   | University of Greifswald                             | Unknown                              |
| SRX757105...SRX792460   | California Institute of Technology (GEO)             | Unknown                              |
| SRX501817...SRX501822   | Georg-August-University of Goettingen                | Unknown                              |
| SRX465141...SRX465165   | Georg-August-University of Goettingen                | San Bernardino                       |
| SRX021963...SRX022010   | Emory University                                     | Unknown                              |
