# Supplementary material for: Characterization of Iflavirus in the Red Flour Beetle, Tribolium castaneum (Coleoptera; Tenebrionidae)
Source: MDPI journal article supplement (doi:10.3390/insects14030220), 2023-02-23
Supplement: s1 [file s1]

Fatehi et al. 2023. Characterization of Iflavirus in the Red Flour Beetle, *Tribolium Castaneum* (Tenebrionidae; Coleoptera).

Supplementary data S4. Sequence alignment iflaviruses, TcIV, DWV, SBPV, and DsLJV

|                   |     |                                                     |
|-------------------|-----|-----------------------------------------------------|
| AUE23905 TcIV     | 1   | -MESLSSNVSVFQVEVKALFKKQKLVINLAAENAEMKSLRETRKI-YASCD |
| ATG71380 DWV      | 1   | -MAFSCGTLSSY-----SAVAQAPSVAHAPRT-WEVDE              |
| YP_003622540 SBPV | 1   | -MEHTPLLSF-----PITLLDHC GGNRKIHWTRCY                |
| QVD33034 DsLJV    | 1   | MQSFVEGIHNMEQ-----LDNGRIKRSKHIPKGFKPICN             |
|                   |     |                                                     |
| AUE23905 TcIV     | 49  | DDLLQSI LRFPSRKAALDHVDLEILKLRFKINAKLHSCSSKIDKVLWYFF |
| ATG71380 DWV      | 31  | A-----RRRRVIKRLALEQERMNVLDADVY-----                 |
| YP_003622540 SBPV | 31  | E-----                                              |
| QVD33034 DsLJV    | 35  | R-----                                              |
|                   |     |                                                     |
| AUE23905 TcIV     | 99  | VNDKLDQLDLFKHPVTRNNLPYCQFRVKQFLA---IRKKYCKKTYDISEQ  |
| ATG71380 DWV      | 56  | -----YQATWEQEDARDNEFLM---EQLNNLYTIYSIAER            |
| YP_003622540 SBPV | 31  | -----QKYWLPFSCCKVASRLPCVNVRSSYMWYSKKQSKW            |
| QVD33034 DsLJV    | 35  | -----QYETCKDES-----GRGYINISFKPLDN                   |
|                   |     |                                                     |
| AUE23905 TcIV     | 146 | YLYNQEMNARKYSKKQKSFVPTKQYYTRVPLSSVS--SSINRFEVLEENIE |
| ATG71380 DWV      | 88  | -----CTRRPIKECSPISVSNRFAPLESK                       |
| YP_003622540 SBPV | 66  | -----IYLSSEDFRACK-AGIYKRREEQEKEK                    |
| QVD33034 DsLJV    | 58  | -----TDSRETLACALERFARLRLKRKSNR                      |
|                   |     |                                                     |
| AUE23905 TcIV     | 194 | LPEPQQDSIIEDDPMYRFHAALFRNGQEISVQLGRHRLDYSNVSYDVQRP  |
| ATG71380 DWV      | 114 | VEVGQEAS-----ECMFKKPKYTRVCKKVKRVTTFRVREKVVRP        |
| YP_003622540 SBPV | 93  | L-----WSELCDICSWECEYYKFRDQR-                        |
| QVD33034 DsLJV    | 84  | VNRPNLTALFND-----WVCGVITILEKQTSRAQERHNNQQG          |
|                   |     |                                                     |
| AUE23905 TcIV     | 244 | YQPTVIPRPVDLWGRLLRERLALRELRLPTVFSPFKMFKNWFMPRDNYFE  |
| ATG71380 DWV      | 152 | ----MCSRSPMLLFKLLKKIYDLHLRYLRKQIRLLR-----           |
| YP_003622540 SBPV | 115 | -----LLLLLRKKIADKAQCRCRTNCKLVTIKHGYVR-----          |
| QVD33034 DsLJV    | 119 | DRTRYVERNTYVLQFMDGML-----RVNCSFKSFK-----FR-----     |
|                   |     |                                                     |
| AUE23905 TcIV     | 294 | AWIKFHIKEGHQE-YEMFVI-----DPCVEALPEMDT--ADAHGEGTL    |
| ATG71380 DWV      | 184 | -----RQKQRE-YELECVT SRLQLSDPVQAK-PEMDNPNPGPDGEV     |
| YP_003622540 SBPV | 147 | -----RVKTIEPCAEIELTNAETFGSNL DFAQPEMDR--PEGSEERTV   |
| QVD33034 DsLJV    | 150 | -----NLQEII-YEAIIM-----ELLSIPQPQMED--DGGQGD TTQ     |
|                   |     | (LP-VP2 cleavage site)                              |
|                   |     |                                                     |
| AUE23905 TcIV     | 334 | QTSQASNNVLTENREDSREVTADFQVTTWKDLCSSFAANYDVNVDRWIL   |
| ATG71380 DWV      | 226 | ELEKDSNNVLT TQRDPST SIPAPVSV-KWSRWTSNDVDDYATITSRWYQ |
| YP_003622540 SBPV | 189 | QT---SNVVLGETNIESQDIASKEYSPTWDRLASSEVSDEY PMLTDRWLF |
| QVD33034 DsLJV    | 184 | DSDKAGNTIITRDADQSVAKEEGIAIPQLISICSTEPMHQFESITNRWMA  |
|                   |     |                                                     |
| AUE23905 TcIV     | 384 | INLFEWTTAS-TQGALLKSYLP---LHMVKKEVVT--CRMPNTLPFTI    |
| ATG71380 DWV      | 275 | IAEFVWSKDD-PFDKELARLILPRALLSSIEANSDAI--CDVPNTIPFKV  |
| YP_003622540 SBPV | 236 | WKSVKWEVNDSAFGKMLVQEKFPQSWVQMDVNVNNIPRYTNIPNFIPFNI  |
| QVD33034 DsLJV    | 234 | LPSIEVKTSD-AFNITLQTYNLP----SFLYSENTAP-----NMMPFEN   |
|                   |     |                                                     |
| AUE23905 TcIV     | 428 | HRYWRGDLEIKIHINANKFQIGSLQCSWYSPNLDAKIDKRLNLWTQSOA   |
| ATG71380 DWV      | 322 | HAYWRGDMEVRVQINSNKFQVQQLQATWYSDHENLNISSKRSVYGFSSQM  |
| YP_003622540 SBPV | 286 | HQYMRADFVKIYVNPND FVSGWLIMAFLYQGSEMFYKLRNPAALMQM    |
| QVD33034 DsLJV    | 273 | FMFGKYDIWFKFVVNANKFHVGVKVLASVKYDSYQID--TLRNSLPALVSR |
|                   |     |                                                     |
| AUE23905 TcIV     | 478 | HHVIINASTSNEVTMVVPYKYHLPYLHTK--PRGDM----PSPPLNLGTL  |
| ATG71380 DWV      | 372 | DHALISASASNEAKLVIPFKHVYPFLPTRIV--DW----TTGILDMGAL   |
| YP_003622540 SBPV | 336 | PHVLVNVGAANEATLKIPYRYVRPFMRCKDILRGDNLITGVTEPLNMGVL  |
| QVD33034 DsLJV    | 321 | PHVMDLAANNEGMLCVPFKYHRTFVRNASLANSQY----GSKAAQYASV   |
|                   |     |                                                     |
| AUE23905 TcIV     | 522 | YIRVLNPLTTSV--NGPTRANVSFVRSFNNEFTGMLSGDIDKI-EDMPY   |
| ATG71380 DWV      | 416 | NIRVIAPLRMSA--TGPTTCNVVVFIKLNNSEFTGTSSGKFYAS-QIRAK  |
| YP_003622540 SBPV | 386 | FVEVLIPFRTSAASSAPKSLDVSLFVKMTNAKFTGMV DGSIALLSKPIAL |

Fatehi et al. 2023. Characterization of Iflavirus in the Red Flour Beetle, *Tribolium Castaneum* (Tenebrionidae; Coleoptera).

|              |       |      |                                                      |
|--------------|-------|------|------------------------------------------------------|
| QVD33034     | DsLJV | 367  | VLSIMSPLAAAV--GAPSNMYIRPFAIAKKASFTGMSY-KIPVW-QMETA   |
| AUE23905     | TcIV  | 569  | PEMDRILDVTAGVLNMLHPDNNRDNPNNRPPQMLVPTASHWSVGTGMA     |
| ATG71380     | DWV   | 463  | PEMDRILNLAEGLLNNTIGGNNMDNPSYQQSPRHFVPTGMHSLALGTNLV   |
| YP_003622540 | SBPV  | 436  | PEMDRILDNGLGVVSKLLKDVNCDNPPDPTPAKFFVPIPSHSHWAGTNTS   |
| QVD33034     | DsLJV | 413  | GAVVSMLDKGLKICGAI---KNMDKPYDDQRVQQVILRPRMNFQTGVGAS   |
|              |       |      | (VP2-VP4 cleavage site) (VP4-VP3 cleavage site)      |
| AUE23905     | TcIV  | 619  | EPIHPLRLDGRGQTPHPPGIE-VNNEIERTISRVFGLLETITWTNNHL-    |
| ATG71380     | DWV   | 513  | EPLHALRLDAAGTTQHPVGCA-PDEDMTVSSIASRYGLIRQVQWKKDHA-   |
| YP_003622540 | SBPV  | 486  | EPTNTLRLDG-GVVGVRSDDIGTSDTAISGIIGVYGLLKPFOWNANDTG    |
| QVD33034     | DsLJV | 460  | DSV-PLRLDPLAQTTYLPDHEYPDDPTTVLDIAKIWGFAGAFWTKASST-   |
| AUE23905     | TcIV  | 666  | ---QQQVIWSADASFPRKNCHYTQPESDTSLGTYAIPPVGVLSMIFYGW    |
| ATG71380     | DWV   | 560  | ---KGSLLQLDADPFVQQRIEGTNPIS-----LYWFAPGVGVSSMFMQW    |
| YP_003622540 | SBPV  | 535  | RNVGHHLLWSMPVHPQV-DKDQVIQVMTQSKLTQYVLPPIVSVSSLYAYT   |
| QVD33034     | DsLJV | 507  | ---EGSELFNPIEPETWRNRDSWAGVPT-----PLEYISSMYQFW        |
| AUE23905     | TcIV  | 714  | RGTIEFRFDVVASQFHTGRLIIAYIPGVTSTTP--ISFAQLRASTNMVFS   |
| ATG71380     | DWV   | 603  | RGSLEYRFDIIASQFHTGRLIVGYVPGLTASLRQQMDYMKLKSSSYVFD    |
| YP_003622540 | SBPV  | 584  | RGSIKYKFLFGNNPRHNARLLVAYIPGISDNR--LTLEARNSAHVFS      |
| QVD33034     | DsLJV | 545  | SGPLEVRLDFVSNAFHTGSIMLSAEFGRAST-----NVEQSGSTYTKVFH   |
| AUE23905     | TcIV  | 762  | LQETDQFTFKVPFICNKPYWPREFAGDY--DRQNSAAPSR-----        |
| ATG71380     | DWV   | 653  | LQESNSFTFEVPPVSYRPPWVRKYGGNY--LPSSTDAPST-----        |
| YP_003622540 | SBPV  | 632  | LNEVSEFVFTVPYITDTMWWPRKYGGPQ--AAGEFVAPSY-----        |
| QVD33034     | DsLJV | 590  | LGNQKTVSFVIPYIYDTV-WRRTSTVPFVSVLRTNLDAARSQGISTMRAN   |
| AUE23905     | TcIV  | 799  | ---IYIAVLNQLIPMESVSQVYINVMYMRAGDDFELIVPVQPSIGLPYNT   |
| ATG71380     | DWV   | 690  | ---LFMYVQVPLIPMEAVSDTIDINVMYVRGGSSFVCPVPQPSLGLNWNT   |
| YP_003622540 | SBPV  | 669  | ---ICMFIINPLVAMESVPSIVTIVPMIAAGDDFEVAVPAQPAVGLSRNI   |
| QVD33034     | DsLJV | 639  | SSAFKVRVINKLVVQSVVQDIQVLVFIRAADTFTLHSPIMSNM---LNS    |
| AUE23905     | TcIV  | 847  | KYLVTNNIKTQIVALSQYYPYSGTFEDFTEAQ--VFRWGTAHQIAH-F     |
| ATG71380     | DWV   | 738  | DFILRND--EEYRAKTGYAPYYAGVWHSFNNSNSLVFRWGSASDQIAQ-W   |
| YP_003622540 | SBPV  | 717  | DVIYPKD--SIISFKSGYFPVYVGSWHSFFDSTKAILRYGAVSDHIAQ--   |
| QVD33034     | DsLJV | 686  | EQVYA-----LQDFPGNYPLENVSELISKISLTDSVREPGAV--QVSHKW   |
| AUE23905     | TcIV  | 894  | DDYNHSDTV-RATICTTTDSLKYTDDK-GTQQTITWAV-----FF        |
| ATG71380     | DWV   | 785  | PTISVP----RGELAF-----LRIRDGKQAAVGTQPWRT-----MV       |
| YP_003622540 | SBPV  | 762  | -LGNIPANVNRKAFWIVVGDITKFKT-KLDKINGTEWFIPEGEYTLGYGV   |
| QVD33034     | DsLJV | 728  | MKGQTPDQI-QNAILVTNEGTLSSNPDPHPLIDPKNVSTAPDSKIESGII   |
| AUE23905     | TcIV  | 933  | NLPQ--LGYPVFGIP-CRSQAAATQLAINCQLKKKALNDPENTPYVLSNKKW |
| ATG71380     | DWV   | 817  | VWPSG-HGYNIGIP-TYNAERARQLAQHLYGGGSLTDEKAKQLFVPANQ-   |
| YP_003622540 | SBPV  | 811  | VWRDGAYAYMVYPPLTPLGEEKIAQYTASLLASNTAISQ--IRPYIPDYI-  |
| QVD33034     | DsLJV | 777  | AAPNPASKYFWV---NSQGSRIT-----YNPSILPPDDYQHVVLPDFE-    |
| AUE23905     | TcIV  | 980  | STSSNTYCTGNPVWTVYAVQPNTL-----AYAEGERG                |
| ATG71380     | DWV   | 863  | -QGPGKVSNGNPVWEVMRAPLATQRAHVQDFE-----FID--AIPEGEES   |
| YP_003622540 | SBPV  | 857  | --VDSAASKDNILWSPIEDRLRAQTE-----WVM--AEPEMERT         |
| QVD33034     | DsLJV | 816  | -----AKKDAYYWNRTARTTRYRYNRTYRTFDIGGGVWMDQPAFAQMDDG   |
|              |       |      | (VP3-VP1 cleavage site)                              |
| AUE23905     | TcIV  | 1012 | QAADLINIGSV-ASTMQGLSIYGENFFSLKDLRRYQLY--GVYNVTFTT    |
| ATG71380     | DWV   | 906  | RNTTLDTTTILQSSGFGRAFFGEAFNDLKTLMRRYQLY--GQLLSVTT     |
| YP_003622540 | SBPV  | 893  | FTPNVMQPTPLLPNTNDGRVTFGEAFNDLKDLPARRYQLYWEGTILEGNLR  |
| QVD33034     | DsLJV | 861  | VKEDTPTETFQIGTNRNNIQTVESHIRIKDILRR-PVCIVSHFNIPAYR    |
| AUE23905     | TcIV  | 1059 | TSTQEYVK----IRFPAVPQGLALNIGTSANINEIFN--RCREGHIPIIA   |
| ATG71380     | DWV   | 954  | DKNIDHCM----FTFPCLPQGLALDIGSAGSPHEIFN--RCRDGIIPLIA   |
| YP_003622540 | SBPV  | 943  | AIRRNAL----VQLPLYPHGLRIQPDVN--NPIWN--IMRDGHIPVIS     |

Fatehi et al. 2023. Characterization of Iflavirus in the Red Flour Beetle, *Tribolium Castaneum* (Tenebrionidae; Coleoptera).

|                                             |      |                 |               |                |                   |              |                          |                      |             |      |             |            |
|---------------------------------------------|------|-----------------|---------------|----------------|-------------------|--------------|--------------------------|----------------------|-------------|------|-------------|------------|
| QVD33034 DsLJV                              | 910  | NVAAGATLSVNPFFV | PCLP          | PPSHMITYG      | TSA--NRIF         | TPLIGR       | SAH                      | THLLD                |             |      |             |            |
| AUE23905 TcIV                               | 1103 | SGYRFYRGSIR     | FRLICDPKIASMI | VVQHRPDRRL     | RYLNIQSQDKTDI     | --D          |                          |                      |             |      |             |            |
| ATG71380 DWV                                | 998  | SGYRFYRGDLRYK   | IVFPSNVNSNI   | WVQHRPDRRL     | LEGWSAAKIINCDAVST |              |                          |                      |             |      |             |            |
| YP_003622540 SBPV                           | 984  | SGFRYFRGGLRLR   | IVVEG-LNSCVW  | VQHPDRPSIF     | ---SRPIIGRYIAA    |              |                          |                      |             |      |             |            |
| QVD33034 DsLJV                              | 958  | L-FRFRGRGSQRYSI | ISHRITGAPIY   | AVYVPHSGAMNC   | GTVTFLTVDLLDT     |              |                          |                      |             |      |             |            |
| AUE23905 TcIV                               | 1151 | GDSVMNHTYASYI   | QLTRINGVIE    | FVPPYYQLGMYGL  | LQYPNVNEASDVGN    |              |                          |                      |             |      |             |            |
| ATG71380 DWV                                | 1048 | GQGVYNHGYASHIQ  | ITRVNNVIELE   | VPFYNATCYTYL   | QAFNASSAAS--S     |              |                          |                      |             |      |             |            |
| YP_003622540 SBPV                           | 1030 | KDAYRNHAYAAAY   | VQNMSVNRTIE   | EVPPFYQPGLYG   | MLNASDNNTANSFDR   |              |                          |                      |             |      |             |            |
| QVD33034 DsLJV                              | 1007 | NCPPSSFGLATE    | VMIPSVNPTMSI  | EVPYETENNWT    | LMQCENWER----     | N            |                          |                      |             |      |             |            |
| AUE23905 TcIV                               | 1201 | Y-YS-LGEIAVS    | SMTMNTADIKS   | FKNSLLSIYY     | CMADDMSFSTF       | QGFPPMI      |                          |                      |             |      |             |            |
| ATG71380 DWV                                | 1096 | YAVS-LGEISVG    | FQATSDDIAT    | IVNKPVTIYY     | SIGDGMQFSQWVG     | YQPPM        |                          |                      |             |      |             |            |
| YP_003622540 SBPV                           | 1080 | LRFTGLGDL       | LIGIEGEQIPKE  | GIE--ISVYYSI   | ADDFSNIFCGF       | PPMV         |                          |                      |             |      |             |            |
| QVD33034 DsLJV                              | 1052 | FSWRDHGDYN      | VGHIVLWSEE    | AFTCD---IFW    | SAGDDFEIKNFL      | GGPPV        |                          |                      |             |      |             |            |
| AUE23905 TcIV                               | 1248 | -----LTSEL      | PLGTL-----    | PSTLED         | FILPEMEYANP---    | EGLLDG       |                          |                      |             |      |             |            |
| ATG71380 DWV                                | 1144 | -----ILD        | QLPAPVV-----  | R-----         | AVP-----          | EGPIAK       |                          |                      |             |      |             |            |
| YP_003622540 SBPV                           | 1127 | -----YCD        | ETYSAA-----   | PD-LA          | QYFEDEV           | TIAQP---     | EMMSM                    |                      |             |      |             |            |
| QVD33034 DsLJV                              | 1098 | APFSKFALSD      | NHPSSQMED     | FSPRERPS       | LARSIYDRIST       | PLACAGAAQIPV |                          |                      |             |      |             |            |
| AUE23905 TcIV                               | 1282 | VKNGVRSIVS      | -----         | ESVQTTVKQ      | AISEEM----        | AKLD         | DPYKKQ                   |                      |             |      |             |            |
| ATG71380 DWV                                | 1165 | IKNFF           | -----         | HQTAD          | EVREVQAAK         | MREDMGIVVQ   | DVIGE                    |                      |             |      |             |            |
| YP_003622540 SBPV                           | 1160 | CQGFV           | GS            | LIGHHLQRAT     | TYGIESAKES        | IRDVVKDEF    | KTQIKPELDNLNKV           |                      |             |      |             |            |
| QVD33034 DsLJV                              | 1148 | IGTAV           | ATGIGAYKL     | GTTIANIE       | DKVGETT           | NNVNNLI----  | HNADDLVSM                |                      |             |      |             |            |
| AUE23905 TcIV                               | 1316 | IIEKL           | -----         | EVNVNES        | IFKIV----         | IECLHLSQ     | SRSIQTICLVVIQ            |                      |             |      |             |            |
| ATG71380 DWV                                | 1199 | LSQAIPDLQ       | ---           | QPEVQANV       | FSLV---           | SQLVHAI      | IGTSLKTVAWAIVS           |                      |             |      |             |            |
| YP_003622540 SBPV                           | 1210 | IGEAANS         | SIGASFGDIL    | PQQLINAM       | ---               | GQLMQV       | FSNPSVALAIAIVT           |                      |             |      |             |            |
| QVD33034 DsLJV                              | 1193 | IKQKIST         | -----         | GLNITNNI       | YTA               | VNGIIDL      | LTNMGRWDFKAISLSILR       |                      |             |      |             |            |
| AUE23905 TcIV                               | 1354 | VLLELKFI        | IVDNLIGIQ     | VLRAVTN-WLS    | RSTSGE            | VEDVADVP     | VVVSPEA                  |                      |             |      |             |            |
| ATG71380 DWV                                | 1241 | IFVT            | LGLIGREMMH    | SVITVVKRLLEK-Y | HLATQPQES         | ASSGTVISAV   | PEA                      |                      |             |      |             |            |
| YP_003622540 SBPV                           | 1256 | FIGSIV          | TLSMELVSTL    | SDSLRIFLEK     | VWY-RYFH          | QATEQQA      | AGASAMPEG                |                      |             |      |             |            |
| QVD33034 DsLJV                              | 1237 | LIINTIN         | VPLTSIASYI    | PEFQNL         | FRR-----          | SPSAQ        | AEDSIEQISES              |                      |             |      |             |            |
| (VP1-Non-structural proteins cleavage site) |      |                 |               |                |                   |              |                          |                      |             |      |             |            |
| AUE23905 TcIV                               | 1403 | LYTNFEV         | KDWGPFV       | GMLFTGV        | TTALSLA           | VAPPKSF      | DT--FSKFLSKQI-P          |                      |             |      |             |            |
| ATG71380 DWV                                | 1289 | --PNAE          | AEESA         | WWSIIYNG       | VCNMLN            | VAAQPKQ      | FKD--WVKLATVDF-S         |                      |             |      |             |            |
| YP_003622540 SBPV                           | 1305 | FWDEAD          | DKSLHGIL      | GMI            | FSATCVSL          | GLSMAPPK     | QFPS--VMKGVKESL-N        |                      |             |      |             |            |
| QVD33034 DsLJV                              | 1279 | FWNEQ           | NIKDA---      | FKLIC          | SI                | VGTAIG       | AVLIAPSNLPTDIIKSILTAPFRT |                      |             |      |             |            |
| AUE23905 TcIV                               | 1450 | TVAKNF          | VFISTF        | VNSIVDLAKRM    | MIRWIMHKVYP       | QEA          | WIDMRDDAGELKD            |                      |             |      |             |            |
| ATG71380 DWV                                | 1335 | NNCRGS          | NQVFVFF       | FKNTFEVLK      | KMWGYIFCQ         | SNPAARLLK    | AVNDEPEILKA              |                      |             |      |             |            |
| YP_003622540 SBPV                           | 1352 | TA----          | NASVTF        | FRNVVDAIK      | YMYTYCMG          | ASDEEMRARI   | IEEYPNLKH                |                      |             |      |             |            |
| QVD33034 DsLJV                              | 1326 | TTVVL           | ANGILRF       | ADITFNI        | IKQACLW           | VASYFDP      | PRVRIVQELRLQSPVIND       |                      |             |      |             |            |
| AUE23905 TcIV                               | 1500 | WVDEV           | LYLCS         | LDMDTRLDE      | DGYLYDRV          | YACLLY       | GREMAARYCG--NSDPK        |                      |             |      |             |            |
| ATG71380 DWV                                | 1385 | WVKE            | CLYLD         | DPKFRM         | RRAHDQ            | EYIERVFAA    | HSYGQILLHDLTAEMNQSRN     |                      |             |      |             |            |
| YP_003622540 SBPV                           | 1398 | WCEE            | VIQLD         | PRSRNIVE       | HDARQASRV         | FDACIY       | GAILQENLD--KSMPG         |                      |             |      |             |            |
| QVD33034 DsLJV                              | 1376 | FMKE            | SQILT         | N              | INRSAM            | QLPA         | FRL-RYWNVV               | KAYEIQRRVIDLPRNAVS   |             |      |             |            |
| AUE23905 TcIV                               | 1548 | IHLFM           | KVYDK         | INDLYWK        | MTAAGRHP          | FVRKEP       | FCIWMYGQPGIGKSFLTEH      |                      |             |      |             |            |
| ATG71380 DWV                                | 1435 | LSVF            | TRVYDQ        | ISK            | LKTDLMEMGS        | NPYIRRE      | CFTICMCGASGIGKSYLTDS     |                      |             |      |             |            |
| YP_003622540 SBPV                           | 1446 | GKVI            | YDLY          | TRIVKL         | RDDLIELGN         | HPDVRFEAF    | PVWIVGSAGIGKSYNTTE       |                      |             |      |             |            |
| QVD33034 DsLJV                              | 1425 | PVLVR           | MCADVI        | KHGKEN         | MADLRCS           | P-VKY        | E                        | PYVLVIHGPAGIGKSNLVTH |             |      |             |            |
| AUE23905 TcIV                               | 1598 | ISSQL           | LQHIK         | -YK            | VMVGP             | KIFTV        | MPACEFWTGCKNQ            | PVLC                 | MDDAFSVSTGN |      |             |            |
| ATG71380 DWV                                | 1485 | LCSE            | LLRAS         | R-TP           | VTTGI             | KCVVN        | PLSDYWDQ                 | CD                   | FQ          | PVLC | VDDMWSVETST |            |
| YP_003622540 SBPV                           | 1496 | LCKR            | ALQ           | SIN-Y          | RTKES             | MIYWL        | ALGQ                     | KYWN                 | GIRN        | PPV  | VAR         | DEAYAV-SGO |

Fatehi et al. 2023. Characterization of Iflavirus in the Red Flour Beetle, *Tribolium Castaneum* (Tenebrionidae; Coleoptera).

|                   |      |                                                      |
|-------------------|------|------------------------------------------------------|
| QVD33034 DsLJV    | 1474 | LAKEMLAALGLTRFQSDPVHIRSAGSKHWNTYSDQPVVVVDDWLNITSPE   |
| AUE23905 TcIV     | 1647 | TMERQLNTMYMVKS PVT LNPPMADLKDKHLRYNPEIFYINSNIAFLN--- |
| ATG71380 DWV      | 1534 | TLDKQLNMLFQVHSPIVLSPPKADLEGKKMRYNPEIFYINTNKPFP---    |
| YP_003622540 SBPV | 1544 | FTEEEISVHLAMCSSCILNPPMAALSEKNKRINPLIYYMNANCAFPS---   |
| QVD33034 DsLJV    | 1524 | LVASTLNELYQLKSCATFVPEQAIEDKKIKATPRLVILLCNNAYPDSVL    |
| AUE23905 TcIV     | 1694 | VPGLD-AAATHRRRDILIEAAIRDEGKQ-----PRDYPREVVKVF        |
| ATG71380 DWV      | 1581 | FDRIA-MEAIYRRRNVLIECRASEKKRGCKHCENDIPIAECSPKMLKDF    |
| YP_003622540 SBPV | 1591 | IPEARHIGAIYRRRKILAEFDFTEETKR---TYPNVLDASELPPNARINN   |
| QVD33034 DsLJV    | 1574 | TNMVSCCKDAVYRRRELTVHCARKPEYEN-----RNLREMSDEESLSM     |
| AUE23905 TcIV     | 1733 | GHLKFRTHKDP RVPSTEDNMWSEWMSYEELITIMKTQYRTFYDQEKENYD  |
| ATG71380 DWV      | 1630 | HHIKFRYAHVC---NSETTWSEWMTYNEFLEWITPVYMANRRKANESFK    |
| YP_003622540 SBPV | 1638 | NHLRIRVAHDPK---NVNTTWSEWMSFDEF SNHFCRKQEHMEAE RVNFR  |
| QVD33034 DsLJV    | 1616 | AHLLFRQDKGF---DSMNLSKKAVGYPEFKKFAIESFKEYDNQERRNVR    |
| AUE23905 TcIV     | 1783 | DRLATYHVIEDGQSEDQQRDDNNHIYSIGEISRRNHQRAID--EYTRAYN   |
| ATG71380 DWV      | 1677 | MRVDEMQLRMDEP-----LEGDNILNKYVE-----VN                |
| YP_003622540 SBPV | 1685 | RRMDAAYAL---DPDYVPGSNLNYVDYELPLQTLHERYIYERELAREYL    |
| QVD33034 DsLJV    | 1662 | QRLDKLMGYFSTTPCDIRDPFVAFYEGCAFATQDDMPLRSEMLEHEIRQV   |
| AUE23905 TcIV     | 1831 | ECLYVKMRGSFERMYE----WMSDLN--MCQRIANYVNP MIVRVNT---   |
| ATG71380 DWV      | 1705 | QRLVEEMKAFKERTL-----WSDLHR--VGAEISASVKKA-----        |
| YP_003622540 SBPV | 1732 | ANIENPVNEIEEDGGF----WSNVKR--L-----                   |
| QVD33034 DsLJV    | 1712 | AGVIETARSDNEALNLSVHNPWSEEVRAQMIAEAACLLSVGTAAIGGLY    |
| AUE23905 TcIV     | 1870 | -IANAGVPEDMLEDEQPCGIST--TLSASYPELRPHPVNSQSSSSTGRRSS  |
| ATG71380 DWV      | 1737 | -LPTISITEKLPHWTVQCGIAKPEMDHAYEVMSSYAAGMNAEIE-AHEQV   |
| YP_003622540 SBPV | 1754 | -YENLTGGAADTEMDVP-GPSTPSEPPSKRVLRQFLVDHCKFKEDAAALL   |
| QVD33034 DsLJV    | 1762 | CLRKLGSYNASEGLEAQCNCLETTKIHYVCGASYSMLQTRSLEGVHKFC    |
| AUE23905 TcIV     | 1918 | THGSYSVNSSQPKSFREMQDTVSSEDQYFSIAPPKF--TTYFSDFKDGE    |
| ATG71380 DWV      | 1786 | RXSSVECQYAE PQGLRRLDDEGPTIDEELMGDTEFA--SQAIERLVDE--  |
| YP_003622540 SBPV | 1803 | TRGLGVCSEQDVRTFALPPEYQFMKDREFVSAASIY--CDTMSCLPNSVC   |
| QVD33034 DsLJV    | 1812 | RTCVNRVQSVGPWSCAVCRNNA---EPVLVMSQSMYESINVL SRLHKASN  |
| AUE23905 TcIV     | 1966 | IVNETQENRLHIFETS-----LECILKDRKIGQKDIDE-----I         |
| ATG71380 DWV      | 1831 | -----GYITGEQKKY--IATW-----CSKRREHIADFDLVWTDNLRVL     |
| YP_003622540 SBPV | 1851 | CSYRRIGSAMNPRSKI--GSNW-----FVLPKNYEDLGKDAIRSYCYWWI   |
| QVD33034 DsLJV    | 1859 | WATNVIGNFINEFDRIVGVKNWGMFLLGCSYISSINTRVRLNGGDNYPYL   |
| AUE23905 TcIV     | 2000 | LKY-----VQRGF GDIVLSEKE-----NLGIFYHTR                |
| ATG71380 DWV      | 1868 | SAY-----VHERSSSTRLSTDDVKLYK-----TISMLHQKY            |
| YP_003622540 SBPV | 1895 | RCY-----QLRSFKKI-LKKENYVEWA-----DRMLHLIGC            |
| QVD33034 DsLJV    | 1909 | MIYNASTAILSSVCFPQLYRF SRLTPATRTYIDLARTKLIDNIPSF SPEA |
| AUE23905 TcIV     | 2026 | RAA-----ERNPREFWRRPW NFWKCVYYGL-----KMGD             |
| ATG71380 DWV      | 1899 | DTT-----ECTKCQHWYAPLT-----DI-----YVDD                |
| YP_003622540 SBPV | 1925 | EPV-----NNYEVELRRQLWKIRGASESEIDMLKELDAEARAHNMSD      |
| QVD33034 DsLJV    | 1959 | EAILARILEYNNSVSTNRFVPEATRTALERDITELVRHRLGDNFTRYIKP   |
| AUE23905 TcIV     | 2055 | TSGTQAIYTLREDWR----DCVHMVSVDTPKNMSYDLFK-----         |
| ATG71380 DWV      | 1921 | K-----KLFWN-----QKEKKTLDVRKLSKEDVTV-----             |
| YP_003622540 SBPV | 1968 | LMAGKELPRITLMWLLTDLTDNDTSVFCDHCKVFATYM-----          |
| QVD33034 DsLJV    | 2009 | I---KGLFFTEEIATLSANIEQYNVALLANPNEWNEELYN SLIARIPPTA  |
| AUE23905 TcIV     | 2089 | ---EEGHHNWYMN---GIKVPH-----CRGGKC-----               |
| ATG71380 DWV      | 1946 | ---QSKLINLSVP-----C-GEVC-----                        |
| YP_003622540 SBPV | 2005 | ---RDL SVLEYVPRYGIIRYPGNFGCMKTIPAECCQCEDS-----       |

Fatehi et al. 2023. Characterization of Iflavirus in the Red Flour Beetle, *Tribolium Castaneum* (Tenebrionidae; Coleoptera).

|                   |      |                                                     |
|-------------------|------|-----------------------------------------------------|
| QVD33034 DsLJV    | 2056 | QNDSEEDDWSMPLRIGARRVNHFSVGLQNAQDYYPYTCDVTKWTGVAEF   |
| AUE23905 TcIV     | 2111 | ---IMDAPFFKALWHWAWLNNHTDQLWQYRKNELRYLPAFFNFDPDSGRE- |
| ATG71380 DWV      | 1961 | ---VLHSKYFNLYLFHKAWL--LENPTWRLIYNG--SKKGMPEYFMNCVD- |
| YP_003622540 SBPV | 2041 | ---IFNNVLFKNAMRILWDHHDHVGPEFTEFQDS-----QTNPFVMQEHNN |
| QVD33034 DsLJV    | 2106 | NTICPHKHFEVHEKEHILYD--KGNFYWNSVQGEVPIKDGWCSNYPECPMA |
| AUE23905 TcIV     | 2158 | LKKELDYFYSFTGRIVMWCKNTLGPMAVKVLKYVA-----            |
| ATG71380 DWV      | 2003 | -EISLDSKFGKVKWQLQAIIDKYLTRPVKMIRDFLFKW----WPQVAYV   |
| YP_003622540 SBPV | 2084 | LRNETRSLLSRIWDWAKDWKTTVPFVGAILTFLYEHE----WAK----    |
| QVD33034 DsLJV    | 2154 | PGNREPHLLAYFEQHKNLWFGIFINKPPHVQKRFIEQLVPRFAWPQWIMT  |
| AUE23905 TcIV     | 2193 | ----VAGVCVGVACSMMW-GIKTLARLFGFNICDDAAVLLTAAATPKLHL  |
| ATG71380 DWV      | 2048 | LS--LLGIT-----GITAYEMRNPKPSTSEELADHYVNRHCSP-DF      |
| YP_003622540 SBPV | 2124 | ----ILSILG--CVVL--YATFTSAKSPTDACMAAAKVSVPVMAGAVGT   |
| QVD33034 DsLJV    | 2204 | EQNDIENPILE--TSSWWDYLVNHPMLVNILKVAAGTVTIGILAGSYSL   |
| AUE23905 TcIV     | 2239 | KAGDFCIAEGA-YNIPSKIVKRPDVKV--MSKMPMAPQQYSNIMAAINR   |
| ATG71380 DWV      | 2085 | WSPGMATPQGLKYSEAVTA-RAPRIHRLPVTTKQGSTQOQDAAVNKILQ   |
| YP_003622540 SBPV | 2167 | WS----SPEGSVYQAGERV---FKASNAPKANRESVSDQMHITEQKVIN   |
| QVD33034 DsLJV    | 2252 | FRWLFPTPEsqIIPSGDSVIRHFRARAQQITRVPASQSEFMDVIVDKINN  |
| AUE23905 TcIV     | 2286 | NTVITAEYFNEKGS-LCSMKARALGLEANRVIMIRHYHDEFTAMPSTR    |
| ATG71380 DWV      | 2134 | NMVYIGVVFVKVPGSKWRDINFRCMLHNRQCLMLRHYLESTAAFPPEGTK  |
| YP_003622540 SBPV | 2210 | NTCFIICKW--QDGKDTKFLRARCLAIKGRDIIVIKHYLQEFKSRNPITY  |
| QVD33034 DsLJV    | 2302 | NYFVIIVV--ENQGNERHLIGC---GVKQRLGIMPKHYYEYICKKKKEEG  |
| AUE23905 TcIV     | 2335 | YYVSLVTNNQLRPRVEINYRECRG----DAFYCK---DPKYGTNFFMLYM  |
| ATG71380 DWV      | 2184 | YYFKYIHNQETRMSSGDISGIEIDLNLRLYYGGLAGEESFDSNIVLVTM   |
| YP_003622540 SBPV | 2258 | MFSYKINNSMANTYIDSSIIDNAY-----IYKIN---NSSAFSNIALIKL  |
| QVD33034 DsLJV    | 2347 | VQFFLAKPHLIKQRVQLAIDEADF-----TYSATADICLYQL          |
| AUE23905 TcIV     | 2378 | PPHIPLFRNINKNLIPTAESH----QYCGRLG-----HLYAFGDATYADLA |
| ATG71380 DWV      | 2234 | PNRIPECKSIKFIASHNEHMRA-QNDGVLVTGDHTQLLAFENNNKTPIS   |
| YP_003622540 SBPV | 2300 | PKHVPFMFKDISKSIVTQGDHANVGHFCSIVS-----QQYDEHPVVRSQVP |
| QVD33034 DsLJV    | 2384 | PASWNMFRDITKYMSLDADLQKKMANNGVIV-----KPPLKSNNYTSVIP  |
| AUE23905 TcIV     | 2419 | FNFEGEYRIQW--GNAPGMVCMNAYTYSKHKPGLCGSVLISEGL--PSTP  |
| ATG71380 DWV      | 2283 | INADGLY-----EVILQGVYTYPHYGDGVCGSILLSRNL---QRP       |
| YP_003622540 SBPV | 2345 | VTWKQHLVIAGD-RHVEQIIMDKCYEYNVRGFGMCGSALVSPGVCCGNGG  |
| QVD33034 DsLJV    | 2429 | VDIKGVYKNQFIMGENGGFNSQHCLKYTFSQKGACGSMVLKDQS---QRP  |
| AUE23905 TcIV     | 2466 | LIGHVHAG-ANGK---GYAEPLFREMF-----DMLSPLEIVDVAP-LDV   |
| ATG71380 DWV      | 2320 | IIGHVHAG-TEGLHGFGVAEPLVHEMFTGKAIESEREPLYDRVYELP-LRE |
| YP_003622540 SBPV | 2394 | VIGLHVAG-EKGS---GFSEPIFREMF-----EPVIEKSDPVVSLPNLRS  |
| QVD33034 DsLJV    | 2476 | IVAMHIAGIGEGVSGIGYGVILTDEMF-AEFQCEVSGKCAHEEPPVVEE   |
| AUE23905 TcIV     | 2505 | AEAKPEVSL--ETVFEETGCHPKMKHVETGKTAYIPSEIAG-VFPITYE   |
| ATG71380 DWV      | 2368 | LD-ESDIGL--DTDLYPIGRVDAKLAHAQSPSTGIKKTLIHG-TFDVRTE  |
| YP_003622540 SBPV | 2435 | VS-ESNVQL--DHNILYGCVDEKMSHKESGKSKIIPSLVHGIEIYPVATE  |
| QVD33034 DsLJV    | 2525 | ID-TAKMHLPEDAVVGyVGLPNNLKPFSPFKSKIKPSLIQD-LLPWTTT   |
| AUE23905 TcIV     | 2552 | PNP--LSPKDPRLPKGSNPIKDGCEKHGM-PVRPFPARMLERASYDLVQK  |
| ATG71380 DWV      | 2414 | PNP--MSSRDPRIAP-HDPLKLGCEKHGM-PCSPFNRKHLELATNHLKEK  |
| YP_003622540 SBPV | 2482 | PNP--LRPGDPRQPPGSHPLRDGCAKHGLGMVHPFPQEDLEQVNNDAARNV |
| QVD33034 DsLJV    | 2573 | KAPAILSQKDERYTHTISPLVAGCAKHGY-LTANFTTSQLHKVR-DLRFE  |
| AUE23905 TcIV     | 2599 | FKACVVPVRKVGVLSEQDAICGNVNVPHFESLEWNSSPGYGYADLKRS    |
| ATG71380 DWV      | 2460 | LVSVPK-INGCKIRSLQDAVCGVPGLDGFDSSISWNTSAGFPLSSLKPP-  |
| YP_003622540 SBPV | 2530 | LLNEVKNPLCEMRLTLQEQVCGSTSIPHCESVNWNSSSEGFLCNRRPA-   |



Fatehi et al. 2023. Characterization of Iflavivirus in the Red Flour Beetle, *Tribolium Castaneum* (Tenebrionidae; Coleoptera).

|                   |      |                              |                                  |                              |
|-------------------|------|------------------------------|----------------------------------|------------------------------|
| QVD33034 DsLJV    | 2621 | QLRRMKPGISPCNR               | LTVEEAII                         | GFAGIEFYDPLHLDTSAGWPLCTSKKT- |
| AUE23905 TcIV     | 2649 | GNPSGKKFLFDLDETPDG-          | YVLKGKHDRLTQIMNEKHEQRKKGIVPATVF  |                              |
| ATG71380 DWV      | 2507 | -GTSGKRWLFDIELQDSGCYLLRGM    | RPELEIQLSTTQLMRKKGIKPHTIF        |                              |
| YP_003622540 SBPV | 2578 | -GVTGKKWLFDMDETAEG-          | YVLKNIDPQLALMLKTNKDLRNRNIVCPPIY  |                              |
| QVD33034 DsLJV    | 2669 | ---LKKDWC-                   | DIERDESGVLISCKLHPEVANQIESEMNR    | RRRGIVPFTVF                  |
| AUE23905 TcIV     | 2698 | VDCLKDTTIPKEKCSVRGKTRIFSISP  | VDFTIQFKQYCGDFLAAYTKARF          |                              |
| ATG71380 DWV      | 2557 | TDCLKDTCLPVEKCRIPGKTRIFSISP  | VQFTIPFRQYYLDFMASYRAARL          |                              |
| YP_003622540 SBPV | 2627 | IDCLKDYRLPPEKCCIPGKTRIFSIAPI | QTTLEIREYMGLFLSGYKSATV           |                              |
| QVD33034 DsLJV    | 2716 | VDTLKDEKKPLAKIHKLGGRVFCAS    | PFAYTVAMRQNFLLHMCAYSTYRW         |                              |
| AUE23905 TcIV     | 2748 | RAEHAIGINVDSEEW              | TGLYNHVTKGYNFITGDYSNFGPGLSLEVANA | AAF                          |
| ATG71380 DWV      | 2607 | NAEHGIGIDVNSLEW              | TNLATSLSKYGTHTIVTGDYKNFGPGLDSDVA | ASAF                         |
| YP_003622540 SBPV | 2677 | MGQHIGIGINPDSYD              | WTRLANYLHEVGDNI                  | VTGDYANFGPCVSSQIVYSCI        |
| QVD33034 DsLJV    | 2766 | ELKHAVGINLQGPQCTEL           | VSRLLRVGHNI                      | VTIDYSNFGPGYNAGVAEQAA        |
| AUE23905 TcIV     | 2798 | EITVEW--YRYHGASEEHLRIL-      | RVMKCEILCARHLC                   | LNVFYSVCCGIPS                |
| ATG71380 DWV      | 2657 | EIIIDVWLHYTEEDNKDEM          | KRVMWTMAQEILAPSHLC               | RDLYVRVPCGIPS                |
| YP_003622540 SBPV | 2727 | DDIIYW--HKINGATEDHCRH        | LELLKYSILLPLHLC                  | DNVCVYQSLNGIAS               |
| QVD33034 DsLJV    | 2816 | QNFKKWTL                     | SNVAGVNEAELDCL----               | LEEGLNSLHCMNNVLYRQGGGSPS     |
| AUE23905 TcIV     | 2845 | GSPITITPLNSIVNSLYLRV         | MMRMFNNHPDYFSLESFNAHVNI          | VTYGDV                       |
| ATG71380 DWV      | 2707 | GSPITDILNTISNGLLIRL          | AWLGITD-----LPLSEFSQNV           | VLVCYGDDL                    |
| YP_003622540 SBPV | 2775 | GSPITAE                      | LNSEVGKKYIKLAFLGICRQL            | NYKYSLNDFNKHCRV              |
| QVD33034 DsLJV    | 2862 | GSPITVIINSEVNIMYIML          | AWDALVKGEKW--RD                  | FEEQVCMYVYGDDL               |
| AUE23905 TcIV     | 2895 | IGCVSDEV                     | RDLYNIASLSENFADFNI               | TFTDARKTG                    |
| ATG71380 DWV      | 2752 | IMNVSDNMIDKFNAVTIGKFF        | SQYKMEFTDQDKSGNT                 | VKWRT-LQTATFL                |
| YP_003622540 SBPV | 2825 | ILSVSDAFVSWFNLQSISEY         | LDNYGIRLTDVTKDGTIVKYRP-          | LADSSFL                      |
| QVD33034 DsLJV    | 2909 | IMSVSDNYIEHFN                | AVTITEFFKKHKIVATNADK             | STEIKPYET-IETATFL            |
| AUE23905 TcIV     | 2945 | SRCFIPHPTRPMIWL              | AGLKKDSIQNAANWIKKK-FCKRDSSL      | INSRMAIE                     |
| ATG71380 DWV      | 2801 | KHGF                         | LKHPTRP-VFLANLDKVS               | VEGTTNWT                     |
| YP_003622540 SBPV | 2874 | KRSFKPHPSRSGIYL              | APIEPSYQECTNWCHKQ-NDEIEAT        | VEVLRASCV                    |
| QVD33034 DsLJV    | 2958 | KCNFVPHPYRSGEWL              | AKLDIESVNDTPMWI                  | KEP-IAFKEATELNAEAGVR         |
| AUE23905 TcIV     | 2994 | LSFGWGPEYYREVCETVRK          | AWVAKNEVLYVKTWEERDKEIFDFK        | CESSIS                       |
| ATG71380 DWV      | 2850 | LAFGWGPEYFN                  | YVRSTIKMAFDKLG                   | IYEDLITWEEMDVRCYASA-----     |
| YP_003622540 SBPV | 2923 | LAYGRGPDEYNNHVNKIR           | RVKALKGLRFDPLTWAALDKENFG-----    |                              |
| QVD33034 DsLJV    | 3007 | AAFGHGKEFFNNYRTNINIAL        | NQIKSDPILLD                      | WHIDIDDSFYGEGSSYNVG          |
| AUE23905 TcIV     | 3044 | FFPVIEF                      |                                  |                              |
| ATG71380 DWV      | 2893 | -----                        |                                  |                              |
| YP_003622540 SBPV | 2964 | -----                        |                                  |                              |
| QVD33034 DsLJV    | 3057 | Q-----                       |                                  |                              |
